1           **Ward-Level Factors Associated with Methicillin-Resistant *Staphylococcus aureus***  
2                           **Acquisition – an Electronic Medical Records study in Singapore**

3                           Zaw Myo Tun<sup>1\*</sup>, Dale A. Fisher<sup>2, 3</sup>, Sharon Salmon<sup>4</sup>, Clarence C. Tam<sup>1, 5</sup>

4

5           <sup>1</sup>Saw Swee Hock School of Public Health, National University of Singapore, Singapore

6           <sup>2</sup>Division of Infectious Diseases, National University Hospital, Singapore

7           <sup>3</sup>Yong Loo Lin School of Medicine, National University of Singapore

8           <sup>4</sup>UNSW Medicine, University of New South Wales, Australia

9           <sup>5</sup>London School of Hygiene and Tropical Medicine, United Kingdom

10

11           \* Corresponding author

12           Email: [zawmyotun@nus.edu.sg](mailto:zawmyotun@nus.edu.sg) (ZMT)

13

14           Short title:

15           Ward characteristics associated with Methicillin-Resistant *Staphylococcus aureus* acquisition

## 1 **Abstract:**

### 2 **Background**

3 Methicillin-Resistant *Staphylococcus aureus* (MRSA) is endemic in hospitals worldwide. When  
4 patients are transferred between wards within a hospital, their risk of acquiring MRSA may  
5 change. In this study, we investigated how ward characteristics and connectivity are associated  
6 with MRSA acquisition.

### 7 **Methods**

8 We analysed electronic medical records on patient transfers and MRSA screening of in-patients  
9 at an acute-care tertiary hospital in Singapore to investigate whether ward characteristics and  
10 connectivity within the hospital network were associated with MRSA acquisition rates over a  
11 period of four years.

### 12 **Results**

13 Most patient transfers concentrated in a stable core network of wards. Factors associated with  
14 increased rate of MRSA acquisition were ward MRSA admission prevalence (rate ratio (RR):  
15 1.50, 95% CI: 1.28, 1.71, per one percentage point increase), admission to a critical care ward  
16 (RR: 1.86, 95% CI: 1.14, 3.06) and average number of patients in the ward on a typical day (RR:  
17 1.31, 95% CI: 1.02, 1.68, for every 10 patients quarterly). Admission to an oncology ward (RR:  
18 0.61, 95% CI: 0.40, 0.93) (compared to medical ward), and median length of stay (RR: 0.71, 95%  
19 CI: 0.54, 0.93) were associated with lower acquisition rates. We did not find evidence that  
20 network measures of ward connectivity, including in-degree, weighted in-degree, influenced  
21 MRSA acquisition rate after adjusting for other ward characteristics.

### 22 **Conclusion**

23 Ward MRSA admission prevalence, critical care ward, ward patient capacity, ward specialty, and  
24 median length of stay, rather than relative connectivity of the ward in the hospital network  
25 were associated with MRSA acquisition.

26

- 1 **Keywords:** infection control, methicillin-resistant *Staphylococcus aureus*, Singapore, electronic
- 2 medical records analysis

## 1 Introduction

2 Since its emergence in the 1960s, Meticillin-Resistant *Staphylococcus aureus* (MRSA) has  
3 become endemic in hospitals worldwide, causing significant health and financial burden (1, 2),  
4 accounting for >20% of *Staphylococcus aureus* bloodstream infections globally (3). In high-  
5 income settings, the incidence of hospital-onset MRSA infection has declined over time,  
6 although progress in controlling MRSA has plateaued in recent years (4-6).

7 In Singapore, a high-income city state in Asia, acute care public hospitals initiated a multi-  
8 pronged MRSA control strategy from 2006 (7-9). This strategy, comprising active surveillance  
9 screening for MRSA, hand hygiene promotion and compliance auditing, cohorting of colonized  
10 patients with contact precaution, and other measures, led to a substantial reduction in hospital-  
11 acquired MRSA bacteremias (7). Despite this, MRSA remains endemic in healthcare settings. A  
12 point prevalence survey in 2014 indicated that 11.8% of patients in a large tertiary public  
13 hospital were colonized by MRSA. The prevalence was higher in intermediate (29.9%) and long-  
14 term (20.4%) care facilities (10).

15 Colonization with MRSA is a major risk factor for invasive disease. Numerous factors are known  
16 to be associated with MRSA colonization, including patient characteristics such as older age  
17 (11), previous hospitalization (11, 12), intensive care unit (ICU) admission (13), chronic illness  
18 (14), exposure to other patients known to be colonized with MRSA (15-17), antibiotic use (12,  
19 15), prolonged hospital stay (16, 18), and receiving medical procedures during hospitalization  
20 (12). Other factors include colonization pressure (13, 16, 19), infection control practices (such  
21 as hand hygiene compliance (7), cohorting (7), environmental decontamination (20), MRSA  
22 colonization status of healthcare staff (21)), and organizational factors (such as staff to patient  
23 ratio (22), bed occupancy rate (23), patient capacity of a ward (24)).

24 Variation in infection control practices and organizational factors between hospital functional  
25 units means that MRSA acquisition risk experienced by a patient is likely to change if they are

1 transferred between wards within a hospital. Studies investigating MRSA acquisition risks  
2 associated with intra-hospital patient transfer are rare, because of the need for longitudinal data  
3 on patient transfers and MRSA colonization status with high temporal resolution. A case-control  
4 study by Dziekan and colleagues found a linear relationship: the greater the number of  
5 between-ward transfers, the higher the risk of MRSA acquisition (25). This led us to assess  
6 whether greater ward connectivity in terms of patient transfer influences MRSA acquisition risk.  
7 In this study, we used high-resolution electronic medical records of in-patient ward transfers  
8 from a large public acute care hospital in Singapore, together with active MRSA admission  
9 screening data, to identify ward characteristics associated with MRSA acquisition.

## 10 **Methods**

### 11 **Data sources**

12 We used a dataset of in-patient electronic medical records from the National University Hospital  
13 (NUH), Singapore spanning January 1, 2010 to December 31, 2013 (the Patient Affordability  
14 Simulation System (PASS)). In addition, we obtained data on in-hospital MRSA acquisitions over  
15 the same period from the hospital's MRSA active surveillance culture data set, as well as ward-  
16 level hand hygiene compliance from audit data.

### 17 **Patient Affordability Simulation System (PASS)**

18 PASS records hospital service use and cost information (26). The following variables were  
19 available in the dataset: ward number, ward specialty, patients' age, and timestamps for  
20 patients' admission, transfers between wards and discharge.

### 21 **MRSA Active Surveillance Cultures**

22 Active MRSA screening is implemented in 36 out of 64 in-patient wards. Other low-risk wards  
23 do not routinely perform active screening and include obstetric, pediatric, psychiatric and acute

1 stay wards. The screening process involves obtaining nasal, axillary, and groin (NAG) swabs at  
2 admission, transfer, and discharge. These samples are cultured on selective chromogenic agar.  
3 Swabs are obtained on the day of or one day before/after the admission or transfer, and on the  
4 day of or one day before discharge. The exceptions are patients hospitalized for <48 hours,  
5 those with a MRSA positive result in a previous hospitalization, and deceased patients. MRSA  
6 results from clinical isolates are not captured in the active screening database.

## 7 **Hand-hygiene compliance**

8 Infection control liaison nurses perform random audits in 40 in-patient wards once a month.  
9 Twenty observations of healthcare staff hand hygiene activities are recorded clandestinely at  
10 any time of the day (27). Hand hygiene compliance is defined as per WHO guidance: the number  
11 of hand hygiene activities performed as a percentage of the total number of hand hygiene  
12 opportunities (28). The data were available quarterly.

## 13 **Data linkage**

14 A third-party analyst who was not a study team member linked these data sets using unique  
15 patient identifiers and anonymized them before providing access to the study team.

## 16 **Network analysis**

17 We constructed a weighted directed network using patient transfer data to understand how  
18 hospital wards are connected. The network comprised all 64 in-patient wards represented as  
19 nodes. Ward connectivity through patient transfers was represented as directed edges linking  
20 the origin and destination wards. Edges were weighted based on the number of patients  
21 transferred over a specific period.

22 To investigate the association of ward connectivity and MRSA acquisition rates, we used in-  
23 degree and weighted in-degree as network centrality measures. The former represents the  
24 number of other wards from which a focal ward receives at least one patient, while the latter

1 reflects the number of patients a focal ward receives from other wards. We constructed 16  
2 quarterly networks from patient transfer data and computed quarterly network measures for  
3 consistency with the temporal resolution of hand hygiene compliance data.

#### 4 **Inclusion and exclusion criteria**

5 We included in the analysis in-patient admissions to one of the 36 active screening wards  
6 lasting >48 hours. We defined a hospitalization episode as the period between admission to and  
7 discharge from the hospital. One hospitalization episode could contain one or more spells,  
8 defined as the period from entry into to exit from a hospital ward.

9 We excluded from analysis episodes with a positive or no screening result at admission;  
10 episodes of patients younger than 15 (pediatric patients are not routinely screened for MRSA);  
11 and episodes with a negative MRSA result at admission but no subsequent MRSA screening  
12 results.

13 A MRSA acquisition event was defined as an initially MRSA-negative patient who was found  
14 positive during a hospitalization episode. For each ward, we estimated MRSA acquisition rate,  
15 defined as the number of MRSA acquisitions per 100 patient-weeks. We computed patient-  
16 weeks at risk for each ward by summing the total time spent by patients in that ward. For  
17 patients who acquired MRSA, their contribution to patient-weeks at risk was censored at the  
18 time of collecting a sample positive for MRSA.

#### 19 **Statistical analysis**

20 We used mixed-effects Poisson regression to identify ward-level factors associated with MRSA  
21 acquisition. The outcome was the total number of MRSA acquisitions in a specific ward in each  
22 quarter. The natural logarithm of the total patient-weeks at risk was used as an offset. We  
23 modelled wards as a random intercept and time (in quarters) as a random slope to account for  
24 ward-level variability in MRSA acquisition rates and their trends, respectively.

1 We extracted nine explanatory variables from the available data sources. Time-varying  
2 variables included quarterly ward in-degree and weighted in-degree, number of patients in a  
3 ward on a typical day, ward MRSA admission prevalence, length of stay, and hand hygiene  
4 compliance. Time-invariant variables were critical care ward (i.e., ICU and high dependency unit  
5 (HDU)), ward specialty (medical, surgical, orthopedics, oncology, and other), and presence of  
6 cohorting beds for MRSA-positive patients. The number of patients in a ward on a typical day  
7 was the quarterly average number of patients registered on the 15<sup>th</sup> of each month. This was  
8 considered a proxy for a ward's patient capacity.

9 We considered ward MRSA admission prevalence as a proxy for colonization pressure. In a  
10 hospital ward, the colonization pressure of a pathogen is mainly influenced by admission of  
11 patients who are already colonized (29). Admission prevalence was measured using only the  
12 first hospitalization of all patients between 2010 and 2013. This is because, as per the screening  
13 protocol, no screening is performed in subsequent hospitalizations if a patient has been  
14 previously identified as MRSA positive; including all hospitalization episodes would  
15 underestimate the admission prevalence.

## 16 **Sensitivity Analyses**

17 Hand hygiene compliance audit was not implemented in some of the active MRSA screening  
18 wards and thus data were unavailable. Consequently, we could not include these wards in  
19 modelling hand hygiene compliance data. We therefore compared the results of the  
20 multivariable models with and without this variable.

21 In 299 out of 2,370 (12.8%) MRSA-positive hospitalization episodes, information on MRSA  
22 screening was missing in at least one ward spell prior to that in which the positive result was  
23 obtained. For these episodes, we could not determine the exact ward in which patients acquired  
24 MRSA. To assess the impact of missing MRSA screening information on the results, we  
25 conducted sensitivity analyses using five scenarios: (1) complete case analysis – we only  
26 included episodes with complete screening results for all spells; (2) mid-point analysis – we



1 assumed that MRSA acquisition occurred in the ward the patient was in at the mid-point  
2 between the last known negative result and the positive result; in the next three scenarios, we  
3 probabilistically attributed MRSA acquisition to spells with missing MRSA results by random  
4 selection (3) using equal probabilities; (4) using a probability weighted by the patient's length  
5 of stay in each spell (16, 18, 19, 30, 31); and (5) using a probability weighted by both length of  
6 stay and MRSA admission prevalence in each spell (16, 19, 30, 31). For scenarios 1 and 2, we  
7 obtained point estimates and confidence intervals from the multivariable model. For scenarios 3  
8 to 5, we iterated the imputation and model fitting 10,000 times to obtain an empirical  
9 distribution of estimates for each parameter. We took the median, 2.5<sup>th</sup> and 97.5<sup>th</sup> percentiles of  
10 these distributions as the point estimate, and lower and upper confidence bounds, respectively.

11 We considered scenario five as the main analysis as we deemed its assumptions to be more  
12 realistically capture the uncertainty associated with missing screening data. Analyses were  
13 carried out using R (version 3.5.2) (32), `igraph` package (33), and `lme4` package (34).

## 14 **Ethics review**

15 Ethical exemption for this secondary data analysis was obtained from the National Healthcare  
16 Group Domain Specific Review Board (reference number: 2018/00890).

## 17 **Results**

18 We successfully linked 92% of MRSA screening results in the MRSA Active Surveillance Cultures  
19 dataset to PASS. A total of 64,362 hospitalization episodes were eligible to investigate factors  
20 associated with MRSA acquisition (Fig 1).

21

1 **Fig 1. Hospitalization episodes from 2010 to 2013 in National University Hospital,**  
2 **Singapore included in the analysis**

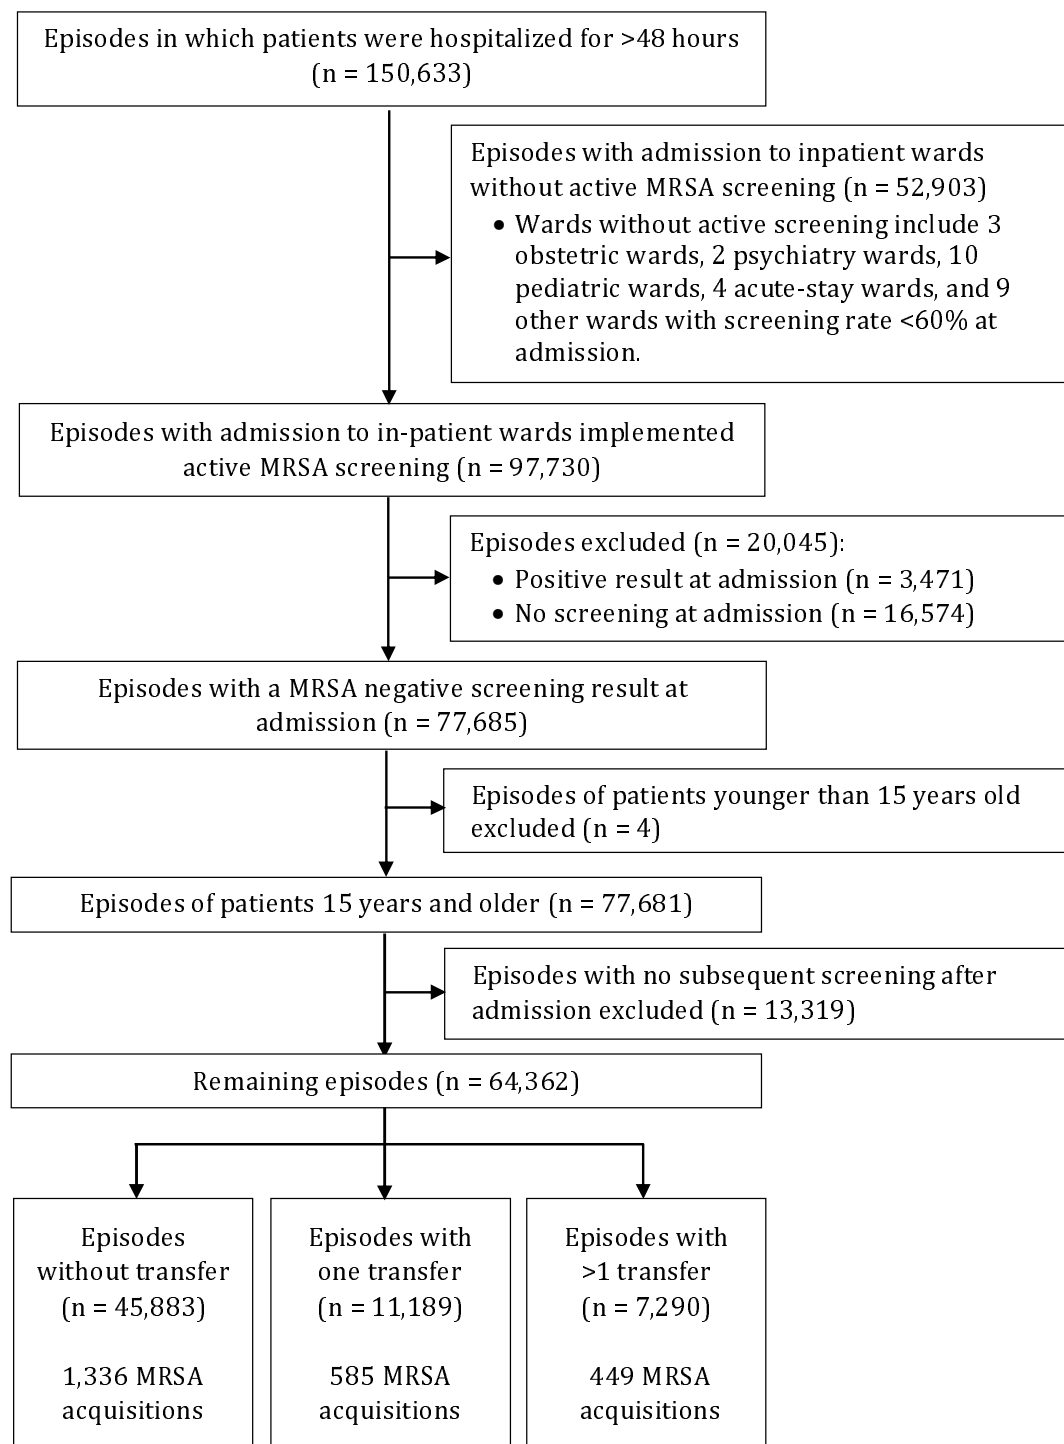

## 1 **Characteristics of in-patient wards**

2 In quarterly networks of 64 in-patient wards, in-degree was highest in Ward 1 Surgery (HDU),  
 3 Ward 1 Medical (ICU/HDU), and Ward 1 Isolation in most quarters over four years. Weighted in-  
 4 degree was highest in Ward 1 Surgery (HDU), Ward 3 Cardiac, and Ward 4 Surgery. On the other  
 5 hand, we observed lowest values in both in-degree and weighted in-degree in Ward 2  
 6 Psychiatry, Ward 2 Other, and Ward 5 Coronary care/Cardiac medical. Characteristics of all 64  
 7 in-patient wards are further enumerated in (S4 Table).

8 Of 36 active screening wards, 8 (22%) were critical care wards; 8 (22%) contained MRSA-  
 9 cohorting beds. Median MRSA admission prevalence was 1.8% (range: 0, 4.7); median hand  
 10 hygiene compliance was 70.4% (range: 61.8, 83.7). Median in-degree and weighted in-degree  
 11 were 21.5 (range: 6, 30) and 137 (range: 16, 410.5), respectively (Table 1).

12 **Table 1. Characteristics of wards with MRSA active screening at the National University**  
 13 **Hospital, Singapore in 2010-2013**

14

| <b>Time invariant variable</b>                | <b>No. wards</b> | <b>%</b>     |
|-----------------------------------------------|------------------|--------------|
| Critical care wards                           | 8                | 22           |
| Presence of MRSA cohorting beds               | 8                | 22           |
| Ward specialty                                |                  |              |
| Medical                                       | 7                | 19           |
| Surgical                                      | 10               | 28           |
| Oncology                                      | 8                | 22           |
| Orthopedics                                   | 3                | 8            |
| Other                                         | 8                | 22           |
| <b>Time varying variable*</b>                 | <b>Median</b>    | <b>Range</b> |
| Number of patients in a ward on a typical day | 21.8             | 2.7, 54.2    |
| Length of stay (days)                         | 3.3              | 2.6, 7.7     |
| Admission prevalence of MRSA                  | 1.8              | 0, 4.7       |
| Hand hygiene compliance (%)                   | 70.4             | 61.8, 83.7   |
| Measures of ward connectivity                 |                  |              |
| In-degree                                     | 21.5             | 6, 30        |
| Weighted in-degree                            | 137              | 16, 410.5    |

15 MRSA, Methicillin-resistant *Staphylococcus aureus*

16 \* Median of quarterly measurements was quantified for each ward. Median and range of these  
 17 values from 36 in-patient wards with active MRSA screening were presented.

## 1 **MRSA acquisition rates**

2 MRSA acquisitions were identified in 2,370 of 64,362 (3.7%) hospitalization episodes over four  
3 years. In the main analysis, the median overall acquisition rate was 3.3 acquisitions per 100  
4 patient-weeks (95% confidence interval (CI): 3.2, 3.5). The impact of missing MRSA results in  
5 spells prior to that in which the positive result was obtained was small: the maximum range of  
6 variability in 16 quarters over 10,000 iterations was only 0.2 acquisitions per 100 patient-  
7 weeks (S1 Fig). The acquisition rates were higher in the hospital wards of the following  
8 specialties: surgery, geriatric medicine, orthopedics, and cardiac. Overall MRSA acquisition rates  
9 by ward are shown in S2 Table.

## 10 **Factors associated with ward-level MRSA acquisition rates**

11 In our main analysis, factors associated with a higher MRSA acquisition rate were: ward  
12 admission prevalence (rate ratio (RR): 1.50, 95% CI: 1.31, 1.72, per one percentage point  
13 increase), critical care ward (RR: 1.86, 95% CI: 1.14, 3.06) and average number of patients on a  
14 typical day (RR: 1.31, 95% CI: 1.02, 1.68, for every 10 additional patients). On the other hand,  
15 oncology ward (RR: 0.61, 95% CI: 0.40, 0.93) (compared to medical ward), and median length of  
16 stay (RR: 0.71, 95% CI: 0.54, 0.93) were associated with a lower acquisition rate (Table 2).  
17 Sensitivity analyses showed that the direction of association was largely consistent across all  
18 scenarios (Fig 2).

19 We compared the above model with one including hand hygiene compliance. The results of the  
20 latter showed that hand hygiene compliance itself was not associated with MRSA acquisition  
21 rate in the subset of wards for which this information was available, after controlling for other  
22 factors. However, compared to the main analysis, the estimates were substantially different for  
23 ward specialty, presence of MRSA cohorting beds, and median length of stay (S3 Table).

24

1 **Table 2. Ward characteristics associated with MRSA acquisition**

| Ward characteristics                                                             | Unadjusted RR (95% CI) | Adjusted RR (95% CI) |
|----------------------------------------------------------------------------------|------------------------|----------------------|
| Critical care wards                                                              |                        |                      |
| No                                                                               | 1                      | 1                    |
| Yes                                                                              | 1.09 (0.68, 1.76)      | 1.86 (1.14, 3.06)    |
| Presence of MRSA cohorting beds                                                  |                        |                      |
| No                                                                               | 1                      | 1                    |
| Yes                                                                              | 1.41 (0.94, 2.11)      | 1.38 (0.95, 2.01)    |
| Ward specialty                                                                   |                        |                      |
| Medical                                                                          | 1                      | 1                    |
| Surgical                                                                         | 1.08 (0.70, 1.65)      | 0.90 (0.62, 1.30)    |
| Oncology                                                                         | 0.43 (0.27, 0.70)      | 0.61 (0.40, 0.93)    |
| Orthopedics                                                                      | 1.24 (0.66, 2.31)      | 0.93 (0.56, 1.54)    |
| Other                                                                            | 1.10 (0.73, 1.66)      | 1.20 (0.78, 1.84)    |
| Number of patients in a ward on a typical day* (for each 10 additional patients) | 1.37 (1.09, 1.73)      | 1.31 (1.02, 1.68)    |
| Median length of stay (for each day increase)                                    | 0.75 (0.59, 0.95)      | 0.71 (0.54, 0.93)    |
| Admission prevalence of MRSA (per one percentage point increase)                 | 1.50 (1.30, 1.72)      | 1.50 (1.31, 1.72)    |
| In-degree (for each additional ward)                                             | 1.40 (0.76, 2.58)      | 0.96 (0.51, 1.79)    |
| Weighted in-degree (for each 10 additional patients)                             | 4.51 (1.21, 16.81)     | 1.25 (0.32, 4.88)    |

2 CI, Confidence Interval; RR, Rate Ratio

1 **Fig 2. Sensitivity analyses accounting for the impact of spells without screening prior to a**  
 2 **positive spell.**

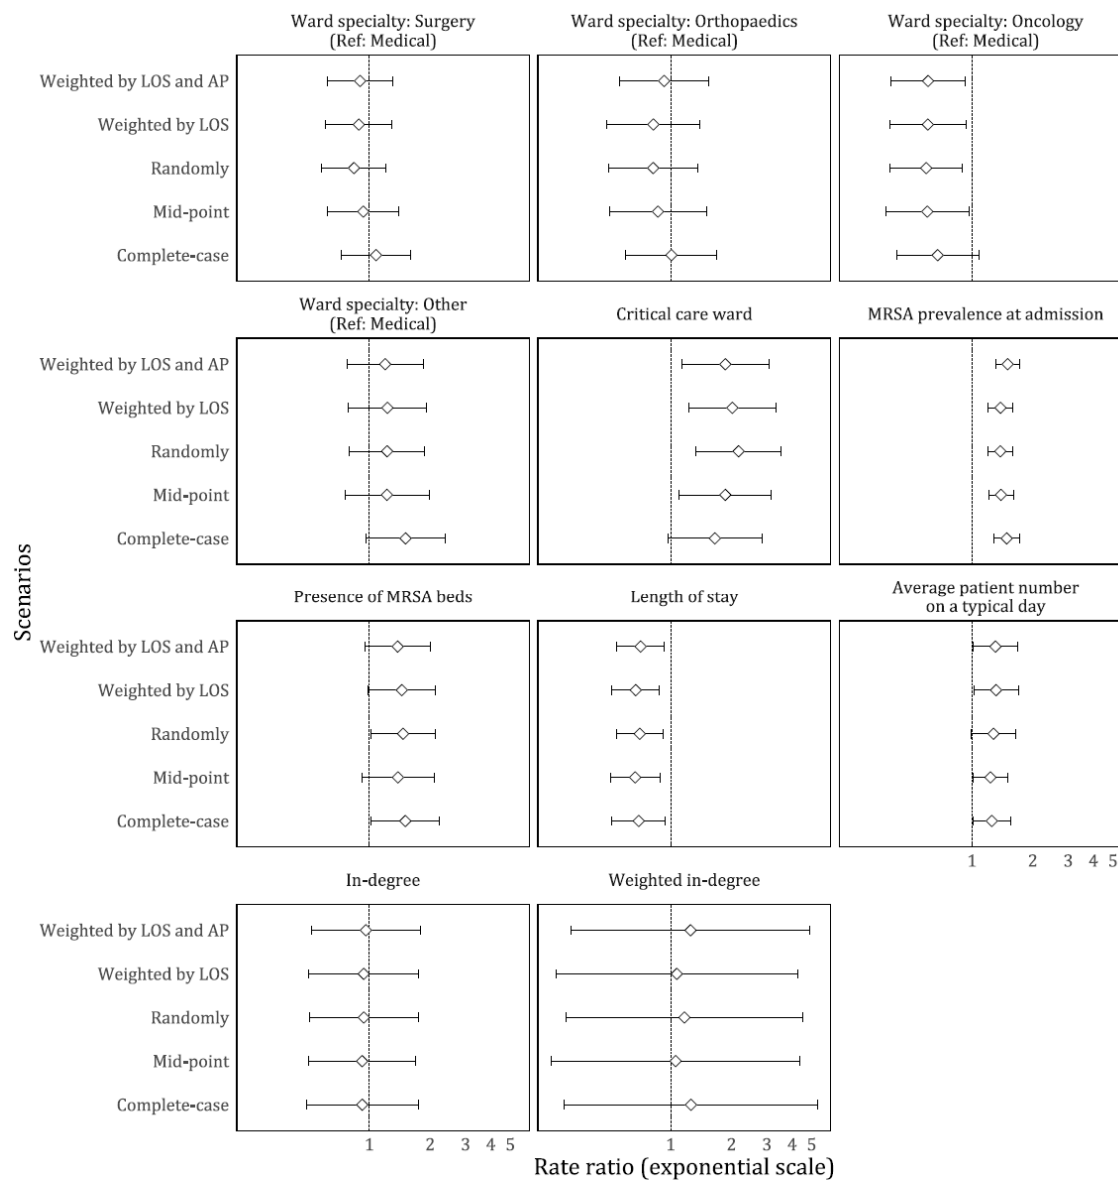

3

4 In our main analysis, these spells were assigned MRSA acquisition with a probability weighted  
 5 by LOS and AP of these spells. Each panel describes rate ratio with corresponding 95%  
 6 confidence interval of each term in the multivariable models.  
 7 AP, Admission prevalence; LOS, Length of stay

8

## 1 Discussion

2 We used electronic medical records with high temporal resolution to understand in-patient  
3 ward connectivity in a large acute care hospital and ward characteristics associated with MRSA  
4 acquisition. We found that ward specialty, median length of stay, MRSA admission prevalence,  
5 critical care ward, average number of patients on a typical day were associated with MRSA  
6 acquisition rates. However, network measures of ward connectivity, such as the number of  
7 wards from which patients were received, or the number of patients received from other wards,  
8 were not associated with MRSA acquisition rates in wards.

9 MRSA acquisition rate was generally lower in oncology wards compared to other wards, after  
10 adjusting for potential confounders. The acquisition rate of a ward reflects a balance between  
11 the ward's case mix (35) and how stringently infection control measures are implemented (36).  
12 Oncology wards, which tend to have patients at higher risk of infections, are likely to have  
13 stricter adherence to infection control measures, and our findings also suggest that  
14 improvements in infection control should be possible for other ward types.

15 We did not find evidence that ward connectivity measures (in-degree and weighted in-degree)  
16 influenced ward-level MRSA acquisition after adjusting for other ward characteristics. It should  
17 be noted that in our ward-level analysis, the connectivity measures used can only account for  
18 the total number of transfers between a ward pair, rather than the number of transfers for  
19 individual patients (25). For instance, a highly connected ward may have lower acquisition rate,  
20 perhaps because of better infection control measures, but it is possible that individual patients  
21 from this ward who undergo more transfers still experience higher MRSA acquisition risk.

22 The median hand hygiene compliance in NUH was 70.4%, comparable to large tertiary hospitals  
23 in Hong Kong (37) and Taiwan (38) using similar monitoring protocols. Differences in the  
24 results of multivariable models with and without hand hygiene compliance suggest that wards

1 with and without the hand hygiene compliance data available differed with respect to the other  
2 characteristics investigated.

3 Although length of hospital stay is an important patient-level risk factor (16, 18, 19, 30, 31), our  
4 ward-level analysis showed the opposite: median length of stay was associated with a lower  
5 MRSA acquisition rate. This may reflect stricter infection control measures in the in-patient  
6 wards in which patient length of stay is longer.

7 In line with previous studies (13, 35, 39), we found that critical care ward status was associated  
8 with higher rate of MRSA acquisition. Critical care patients are known to be at particularly high  
9 risk for nosocomial infections, pointing to a need for more stringent infection control measures  
10 in these wards.

11 Several limitations should be considered when interpreting our findings. Firstly, the  
12 unavailability of MRSA results from clinical isolates means that we could not include a subset of  
13 MRSA acquisitions that are not identified through routine screening. However, the incidence of  
14 MRSA infections in NUH is <1 per 100 patient-weeks (40), so the impact of this is likely small.  
15 Secondly, we could not adjust for ward staffing level (22, 41), or MRSA colonization status and  
16 compliance with contact precaution measures of healthcare staff as this information is not  
17 routinely available (21, 42). Lastly, this ward-level analysis cannot account for individual-level  
18 differences in MRSA acquisition risk, including age, gender, comorbidities, and use of out-  
19 patient services. More detailed individual-level analyses could investigate the interaction  
20 between individual and ward-level risk factors. Nonetheless, electronic medical records  
21 provided objective measures of patients' transfers through hospital that do not rely on recall  
22 and self-report, a major strength of this analysis.

23 Our analysis demonstrates an efficient use of linked electronic medical records and infection  
24 control data to comprehensively study the complexity of intra-hospital patient transfer  
25 patterns. Although we did not find evidence of the association of ward connectivity and MRSA  
26 acquisition, our findings highlighted other ward characteristics associated with MRSA



1 acquisition rate, pointing to a need for further investigation and strengthening MRSA control  
2 efforts. Similar methods could be used to understand the transmission dynamics of other  
3 nosocomial organisms.

#### 4 **Acknowledgements**

5 The authors thank Mark Salloway and Joanne Chee on their assistance in data retrieval and  
6 linkage.

7

## 1 **References**

- 2 1. Pada SK, Ding Y, Ling ML, Hsu LY, Earnest A, Lee TE, et al. Economic and clinical impact  
3 of nosocomial methicillin-resistant *Staphylococcus aureus* infections in Singapore: a matched  
4 case-control study. *J Hosp Infect.* 2011;78(1):36-40.
- 5 2. Nathwani D. Impact of methicillin-resistant *Staphylococcus aureus* infections on key  
6 health economic outcomes: does reducing the length of hospital stay matter? *The Journal of*  
7 *antimicrobial chemotherapy.* 2003;51 Suppl 2:ii37-44.
- 8 3. World Health Organization. *Antimicrobial Resistance: Global Report on Surveillance.*  
9 Geneva: World Health Organization; 2014.
- 10 4. Kourtis AP, Hatfield K, Baggs J, Mu Y, See I, Epton E, et al. Vital Signs: Epidemiology and  
11 Recent Trends in Methicillin-Resistant and in Methicillin-Susceptible *Staphylococcus aureus*  
12 Bloodstream Infections - United States. *MMWR Morbidity and mortality weekly report.*  
13 2019;68(9):214-9.
- 14 5. Laupland KB, Lyytikainen O, Sogaard M, Kennedy KJ, Knudsen JD, Ostergaard C, et al. The  
15 changing epidemiology of *Staphylococcus aureus* bloodstream infection: a multinational  
16 population-based surveillance study. *Clin Microbiol Infect.* 2013;19(5):465-71.
- 17 6. European Center for Disease Prevention and Control. *Surveillance Atlas of Infectious*  
18 *Diseases Solna Municipality, Sweden 2019* [Available from:  
19 <http://atlas.ecdc.europa.eu/public/index.aspx>.
- 20 7. Fisher D, Tambyah PA, Lin RT, Jureen R, Cook AR, Lim A, et al. Sustained methicillin-  
21 resistant *Staphylococcus aureus* control in a hyper-endemic tertiary acute care hospital with  
22 infrastructure challenges in Singapore. *J Hosp Infect.* 2013;85(2):141-8.
- 23 8. MOH Singapore. *The national infection prevention and control guidelines for acute*  
24 *healthcare facilities.* In: Ministry of Health Singapore, editor. Singapore 2017.
- 25 9. Win MK, Soliman TA, Lee LK, Wong CS, Chow A, Ang B, et al. Review of a two-year  
26 methicillin-resistant *Staphylococcus aureus* screening program and cost-effectiveness analysis  
27 in Singapore. *BMC infectious diseases.* 2015;15:391.

- 1 10. Chow A, Lim VW, Khan A, Pettigrew K, Lye DCB, Kanagasabai K, et al. MRSA  
2 Transmission Dynamics Among Interconnected Acute, Intermediate-Term, and Long-Term  
3 Healthcare Facilities in Singapore. *Clin Infect Dis*. 2017;64(suppl\_2):S76-s81.
- 4 11. Santos HB, Machado DP, Camey SA, Kuchenbecker RS, Barth AL, Wagner MB. Prevalence  
5 and acquisition of MRSA amongst patients admitted to a tertiary-care hospital in Brazil. *BMC*  
6 *infectious diseases*. 2010;10:328.
- 7 12. Graffunder EM, Venezia RA. Risk factors associated with nosocomial methicillin-  
8 resistant *Staphylococcus aureus* (MRSA) infection including previous use of antimicrobials. *The*  
9 *Journal of antimicrobial chemotherapy*. 2002;49(6):999-1005.
- 10 13. Grundmann H, Barwolff S, Tami A, Behnke M, Schwab F, Geffers C, et al. How many  
11 infections are caused by patient-to-patient transmission in intensive care units? *Crit Care Med*.  
12 2005;33(5):946-51.
- 13 14. von Baum H, Schmidt C, Svoboda D, Bock-Hensley O, Wendt C. Risk factors for  
14 methicillin-resistant *Staphylococcus aureus* carriage in residents of German nursing homes.  
15 *Infect Control Hosp Epidemiol*. 2002;23(9):511-5.
- 16 15. Moore C, Dhaliwal J, Tong A, Eden S, Wigston C, Willey B, et al. Risk factors for  
17 methicillin-resistant *Staphylococcus aureus* (MRSA) acquisition in roommate contacts of  
18 patients colonized or infected with MRSA in an acute-care hospital. *Infect Control Hosp*  
19 *Epidemiol*. 2008;29(7):600-6.
- 20 16. Giuffre M, Amodio E, Bonura C, Geraci DM, Saporito L, Ortolano R, et al. Methicillin-  
21 resistant *Staphylococcus aureus* nasal colonization in a level III neonatal intensive care unit:  
22 Incidence and risk factors. *Am J Infect Control*. 2015;43(5):476-81.
- 23 17. Merrer J, Santoli F, Appere de Vecchi C, Tran B, De Jonghe B, Outin H. "Colonization  
24 pressure" and risk of acquisition of methicillin-resistant *Staphylococcus aureus* in a medical  
25 intensive care unit. *Infect Control Hosp Epidemiol*. 2000;21(11):718-23.
- 26 18. Loke HY, Kyaw WM, Chen MIC, Lim JW, Ang B, Chow A. Length of stay and odds of MRSA  
27 acquisition: a dose-response relationship? *Epidemiology and infection*. 2019;147:e223.

- 1 19. Marshall C, Harrington G, Wolfe R, Fairley CK, Wesselingh S, Spelman D. Acquisition of  
2 methicillin-resistant *Staphylococcus aureus* in a large intensive care unit. *Infect Control Hosp*  
3 *Epidemiol.* 2003;24(5):322-6.
- 4 20. Kluytmans J, van Leeuwen W, Goessens W, Hollis R, Messer S, Herwaldt L, et al. Food-  
5 initiated outbreak of methicillin-resistant *Staphylococcus aureus* analyzed by pheno- and  
6 genotyping. *J Clin Microbiol.* 1995;33(5):1121-8.
- 7 21. Haill C, Fletcher S, Archer R, Jones G, Jayarajah M, Frame J, et al. Prolonged outbreak of  
8 methicillin-resistant *Staphylococcus aureus* in a cardiac surgery unit linked to a single colonized  
9 healthcare worker. *J Hosp Infect.* 2013;83(3):219-25.
- 10 22. Hugonnet S, Harbarth S, Sax H, Duncan RA, Pittet D. Nursing resources: a major  
11 determinant of nosocomial infection? *Current opinion in infectious diseases.* 2004;17(4):329-  
12 33.
- 13 23. Kaier K, Mutters NT, Frank U. Bed occupancy rates and hospital-acquired infections—  
14 should beds be kept empty? *Clinical Microbiology and Infection.* 2012;18(10):941-5.
- 15 24. Kibbler CC, Quick A, O'Neill AM. The effect of increased bed numbers on MRSA  
16 transmission in acute medical wards. *Journal of Hospital Infection.* 1998;39(3):213-9.
- 17 25. Dziekan G, Hahn A, Thune K, Schwarzer G, Schafer K, Daschner FD, et al. Methicillin-  
18 resistant *Staphylococcus aureus* in a teaching hospital: investigation of nosocomial transmission  
19 using a matched case-control study. *J Hosp Infect.* 2000;46(4):263-70.
- 20 26. Gunapal PPG, Kannapiran P, Teow KL, Zhu Z, Xiaobin You A, Saxena N, et al. Setting up a  
21 regional health system database for seamless population health management in Singapore.  
22 *Proceedings of Singapore Healthcare.* 2015;25(1):27-34.
- 23 27. National University Hospital. Hospital Wide Indicators 2019 [Available from:  
24 [https://www.nuh.com.sg/About-NUH/Clinical-Outcomes/Pages/Hospital-Wide-  
Indicators.aspx](https://www.nuh.com.sg/About-NUH/Clinical-Outcomes/Pages/Hospital-Wide-<br/>25 Indicators.aspx).

- 1 28. World Health Organization, WHO Patient Safety. Hand hygiene technical reference  
2 manual: to be used by health-care workers, trainers and observers of hand hygiene practices.  
3 Geneva: World Health Organization; 2009.
- 4 29. DalBen MF, Basso M, Garcia CP, Costa SF, Toscano CM, Jarvis WR, et al. Colonization  
5 pressure as a risk factor for colonization by multiresistant *Acinetobacter* spp and carbapenem-  
6 resistant *Pseudomonas aeruginosa* in an intensive care unit. *Clinics (Sao Paulo)*.  
7 2013;68(8):1128-33.
- 8 30. Thompson DS. Methicillin-resistant *Staphylococcus aureus* in a general intensive care  
9 unit. *J R Soc Med*. 2004;97(11):521-6.
- 10 31. Marshall C, Spelman D, Harrington G, McBryde E. Daily hazard of acquisition of  
11 methicillin-resistant *Staphylococcus aureus* infection in the intensive care unit. *Infect Control*  
12 *Hosp Epidemiol*. 2009;30(2):125-9.
- 13 32. R Core Team. R: A Language and Environment for Statistical Computing. Vienna, Austria:  
14 R Foundation for Statistical Computing; 2019.
- 15 33. Csardi G, Nepusz T. The igraph software package for complex network research.  
16 *InterJournal*. 2006;Complex Systems:1695.
- 17 34. Bates D, Mächler M, Bolker B, Walker S. Fitting Linear Mixed-Effects Models Using lme4.  
18 *Journal of Statistical Software*. 2015;67(1):1-48.
- 19 35. Meers PD, Leong KY. The impact of methicillin- and aminoglycoside-resistant  
20 *Staphylococcus aureus* on the pattern of hospital-acquired infection in an acute hospital. *J Hosp*  
21 *Infect*. 1990;16(3):231-9.
- 22 36. Sadsad R, Sintchenko V, McDonnell GD, Gilbert GL. Effectiveness of hospital-wide  
23 methicillin-resistant *Staphylococcus aureus* (MRSA) infection control policies differs by ward  
24 specialty. *PLoS One*. 2013;8(12):e83099.
- 25 37. Chau JP, Thompson DR, Twinn S, Lee DT, Pang SW. An evaluation of hospital hand  
26 hygiene practice and glove use in Hong Kong. *Journal of clinical nursing*. 2011;20(9-10):1319-  
27 28.

- 1 38. Pan SC, Tien KL, Hung IC, Lin YJ, Sheng WH, Wang MJ, et al. Compliance of health care  
2 workers with hand hygiene practices: independent advantages of overt and covert observers.  
3 PLoS One. 2013;8(1):e53746.
- 4 39. Oztoprak N, Cevik MA, Akinci E, Korkmaz M, Erbay A, Eren SS, et al. Risk factors for ICU-  
5 acquired methicillin-resistant *Staphylococcus aureus* infections. Am J Infect Control.  
6 2006;34(1):1-5.
- 7 40. Tambyah PA, Kumarasinghe G. Methicillin-resistant *Staphylococcus aureus* control at  
8 the National University Hospital, Singapore: a historical perspective. Ann Acad Med Singap.  
9 2008;37(10):855-60.
- 10 41. Mitchell BG, Gardner A, Stone PW, Hall L, Pogorzelska-Maziarz M. Hospital Staffing and  
11 Health Care-Associated Infections: A Systematic Review of the Literature. Joint Commission  
12 journal on quality and patient safety. 2018;44(10):613-22.
- 13 42. Price JR, Cole K, Bexley A, Kostiou V, Eyre DW, Golubchik T, et al. Transmission of  
14 *Staphylococcus aureus* between health-care workers, the environment, and patients in an  
15 intensive care unit: a longitudinal cohort study based on whole-genome sequencing. The Lancet  
16 Infectious diseases. 2017;17(2):207-14.

17

18

## 1 Supporting Information

### 2 S1 Fig. Quarterly MRSA acquisition rate among MRSA active 3 screening wards at National University Hospital, 2010-2013

4

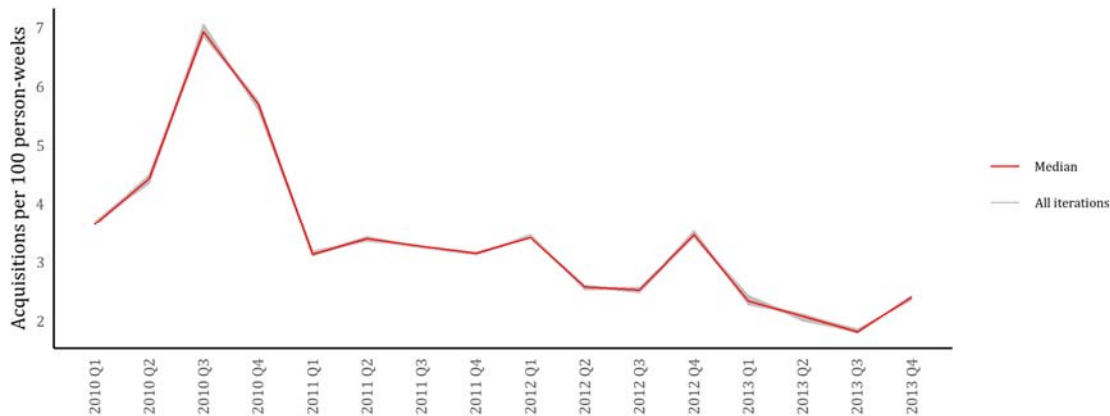

5  
6

1 **S2 Table. MRSA acquisition rate in MRSA active screening**  
 2 **wards of National University Hospital, 2010-2013**

| Ward <sup>^</sup>                | Acquisition rate* | 95% CI    | Median MRSA acquisitions <sup>#</sup> | Median person-week at risk <sup>#</sup> |
|----------------------------------|-------------------|-----------|---------------------------------------|-----------------------------------------|
| 11 Surgery, HDU                  | 12.9              | 4.2, 30.0 | 5                                     | 38.9                                    |
| 6 Medical, Geriatric Medicine    | 5.8               | 5.0, 6.6  | 205                                   | 3539.0                                  |
| 2 Orthopaedics                   | 5.1               | 4.4, 6.0  | 163                                   | 3169.8                                  |
| 3 Cardiac                        | 4.8               | 4.2, 5.4  | 249                                   | 5194.4                                  |
| 4 Cardiac                        | 4.5               | 3.8, 5.2  | 173                                   | 3882.2                                  |
| 4 Surgery                        | 4.3               | 3.6, 5.0  | 161                                   | 3770.6                                  |
| 2 Cardio-Thoracic ICU            | 4.2               | 3.1, 5.5  | 52                                    | 1241.6                                  |
| 2 Medical                        | 4.2               | 3.6, 4.8  | 173                                   | 4157.3                                  |
| 8 Medical, Neuro                 | 4.2               | 3.3, 5.2  | 72                                    | 1730.7                                  |
| 5 Medical, Renal                 | 3.9               | 3.3, 4.5  | 156                                   | 4038.0                                  |
| 5 Surgery                        | 3.8               | 3.2, 4.4  | 162                                   | 4311.7                                  |
| 1 Surgery, HDU                   | 3.5               | 2.7, 4.5  | 63                                    | 1804.1                                  |
| 2 Neurosurgery, HDU              | 3.3               | 2.3, 4.7  | 31                                    | 931.2                                   |
| 1 Medical, ICU, HDU              | 3.3               | 2.5, 4.4  | 54                                    | 1614.6                                  |
| 1 Cardiac                        | 3.2               | 2.2, 4.5  | 33                                    | 1037.9                                  |
| 3 Other ward                     | 3.0               | 2.1, 4.0  | 2                                     | 67.4                                    |
| 3 Surgery, ICU                   | 3.0               | 0.4, 10.7 | 25                                    | 864.3                                   |
| 1 Oncology, Medical              | 2.9               | 1.9, 4.3  | 43                                    | 1456.9                                  |
| 6 Surgery                        | 2.9               | 2.2, 3.6  | 71                                    | 2571.1                                  |
| 2 Oncology                       | 2.8               | 2.2, 3.5  | 70                                    | 2454.7                                  |
| 4 Oncology                       | 2.5               | 1.9, 3.2  | 61                                    | 2465.4                                  |
| 2 Isolation                      | 2.5               | 1.9, 3.4  | 48                                    | 1890.3                                  |
| 5 Coronary Care, Cardiac Medical | 2.4               | 1.2, 4.1  | 12                                    | 509.1                                   |
| 9 Surgery                        | 2.2               | 1.4, 3.3  | 24                                    | 1084.1                                  |
| Medical, Surgery mixed           | 2.1               | 1.5, 2.9  | 38                                    | 1796.4                                  |
| 3 Oncology                       | 1.8               | 1.3, 2.4  | 51                                    | 2849.0                                  |
| 1 Orthopaedics                   | 1.7               | 1.3, 2.2  | 59                                    | 3520.5                                  |
| 4 Medical, HDU                   | 1.7               | 0.6, 3.6  | 6                                     | 361.9                                   |
| 9 Medical                        | 1.4               | 0.8, 2.3  | 14                                    | 1011.8                                  |
| 8 Surgery                        | 1.0               | 0.5, 1.9  | 10                                    | 955.1                                   |
| 3 Orthopaedics                   | 0.8               | 0.3, 1.9  | 5                                     | 614.3                                   |
| 6 Oncology, Medical              | 0.8               | 0.3, 1.7  | 7                                     | 862.7                                   |
| 10 Surgery                       | 0.6               | 0.1, 1.6  | 3                                     | 541.9                                   |
| 8 Oncology                       | 0.5               | 0.2, 1.2  | 5                                     | 949.8                                   |
| 7 Oncology                       | 0.5               | 0.2, 1.1  | 5                                     | 1023.5                                  |
| 5 Oncology, HDU                  | 0.2               | 0, 0.7    | 2                                     | 1068.2                                  |

3 CI, Confidence interval; HDU, High dependency unit; ICU, Intensive care unit

4 \* Number of MRSA acquisitions per 100 person-weeks

5 ^ The ward numbers are masked



1 # Median value from 10,000 iterations in the main analysis

2

1 **S3 Table. Multivariable analysis with and without hand**  
 2 **hygiene compliance**

| Ward characteristics                                                             | Model including hand hygiene compliance<br>Adjusted RR (95% CI) | Final model<br>Adjusted RR (95% CI) |
|----------------------------------------------------------------------------------|-----------------------------------------------------------------|-------------------------------------|
| Critical care wards                                                              |                                                                 |                                     |
| No                                                                               | 1                                                               | 1                                   |
| Yes                                                                              | 1.83 (1.20, 2.79)                                               | 1.86 (1.14, 3.06)                   |
| Presence of MRSA cohorting beds                                                  |                                                                 |                                     |
| No                                                                               | 1                                                               | 1                                   |
| Yes                                                                              | 1.78 (1.42, 2.22)                                               | 1.38 (0.95, 2.01)                   |
| Ward specialty                                                                   |                                                                 |                                     |
| Medical                                                                          | 1                                                               | 1                                   |
| Surgical                                                                         | 1.02 (0.80, 1.28)                                               | 0.90 (0.62, 1.30)                   |
| Oncology                                                                         | 1.09 (0.81, 1.48)                                               | 0.61 (0.40, 0.93)                   |
| Orthopedics                                                                      | 1.16 (0.83, 1.61)                                               | 0.93 (0.56, 1.54)                   |
| Other                                                                            | 1.67 (1.26, 2.20)                                               | 1.20 (0.78, 1.84)                   |
| Number of patients in a ward on a typical day* (for each 10 additional patients) | 1.57 (1.22, 2.00)                                               | 1.31 (1.02, 1.68)                   |
| Median length of stay (for each day increase)                                    | 1.02 (0.77, 1.36)                                               | 0.71 (0.54, 0.93)                   |
| Admission prevalence of MRSA (per one percentage point increase)                 | 1.48 (1.28, 1.70)                                               | 1.50 (1.31, 1.72)                   |
| In-degree (for each additional ward)                                             | 1.12 (0.61, 2.04)                                               | 0.96 (0.51, 1.79)                   |
| Weighted in-degree (for each 10 additional patients)                             | 1.50 (0.57, 3.97)                                               | 1.25 (0.32, 4.88)                   |
| Hand hygiene compliance (for each percentage point increase)                     | 0.96 (0.90, 1.02)                                               |                                     |

3 CI, Confidence Interval; RR, Rate Ratio
